# Supplementary material for: SARS-CoV-2 omicron spike simulations: broad antibody escape, weakened ACE2 binding, and modest furin cleavage
Source: PubMed Central journal article supplement (PMC10580870; doi:10.1128/spectrum.01213-22), 2023-08-31
Supplement: spectrum.01213-22-s0001.pdf [file spectrum.01213-22-s0001.pdf]

**Supplemental Information for:**

SARS-CoV-2 omicron spike simulations: broad antibody escape, weakened ACE2 binding, modest Furin cleavage

M.Z. Jawaid, A. Baidya, R. Mahboubi Ardakani, R. L. Davis, D. L. Cox<sup>1</sup>

<sup>1</sup>Author for correspondence

**This PDF includes:**

Supplementary Data Tables

Supplementary Figure

All PDB files for simulations and AlphaFold files for the structures here can be found in the link

<https://drive.google.com/drive/folders/1d3H4hA4j6L4ICdXrzrswkhz0F2z0ak2W?usp=sharing>

## Supplemental Data Tables

|             | NTD (1-300)                                     | RBD (300-540)                                                                                                  | FCD (679-685) |
|-------------|-------------------------------------------------|----------------------------------------------------------------------------------------------------------------|---------------|
| Delta       | T19R, G142D, E156G, Δ157-158                    | L452R, T478K                                                                                                   | P681R         |
| Omicron BA1 | A67V, Δ69-70, T95I, G142D, N211I, Δ212, ins214R | G339D, R346K, S371L, S373P, S375F, K417N, N440K, G446S, S477N, T478K, E484A, Q493R, G496S, Q498R, N501Y, Y505H | N679K, P681H  |
| Omicron BA2 | T19I, L24S, Δ25-27, G142D, V213G                | G339D, R346K, S371F, S373P, S375F, T376A, D405N, K417N, N440K, S477N, T478K, E484A, Q493R, Q498R, N501Y, Y505H | N679K, P681H  |

**Supplementary Table 1:** Spike Protein Mutations relative to WT (Wuhan-Hu-1) in the N-terminal domain (NTD), receptor binding domain (RBD), and the Furin Cleavage Domain (FCD)<sup>1</sup>.

<sup>1</sup>Gangavarapu, K., Latif, A. A., Mullen, J. L., Alkuzweny, M., Hufbauer, E., Tsueng, G., Haag, E., Zeller, M., Aceves, C. M., Zaiets, K., Cano, M., Zhou, J., Qian, Z., Sattler, R., Matteson, N. L., Levy, J. I., Lee, R. T., Freitas, L., ... Maurer-Stroh, S. (2022). Outbreak.info genomic reports: scalable and dynamic surveillance of SARS-CoV-2 variants and mutations. Cold Spring Harbor Laboratory. <https://doi.org/10.1101/2022.01.27.22269965>

| Bound Pair  | WT                  | Delta               | BA1                 | BA2                      |
|-------------|---------------------|---------------------|---------------------|--------------------------|
| RBD-ACE2    | 8.71 ± 2.03         | <b>10.57 ± 1.46</b> | <b>7.17 ± 1.48</b>  | <b>7.08 ± 1.47</b>       |
| RBD-C12.B1A | <b>19.23 ± 1.87</b> | <b>14.94 ± 2.61</b> | <b>11.27 ± 1.71</b> | <b>11.33 ± 1.81</b>      |
| RBD-P4A1    | <b>17.76 ± 2.01</b> | <b>17.61 ± 2.03</b> | <b>12.17 ± 2.45</b> | <b>14.06 ± 2.07</b>      |
| RBD-CR3022  | <b>12.58 ± 1.82</b> | <b>12.22 ± 1.59</b> | <b>10.81 ± 1.97</b> | <b>11.31 ± 1.45</b>      |
| NTD-4A8     | <b>9.62 ± 1.78</b>  | <b>7.48 ± 1.49</b>  | <b>4.84 ± 1.63</b>  | <b>7.84 ± 2.47</b>       |
| FCD-Furin   | 10.73 ± 1.73        | <b>15.36 ± 1.88</b> | <b>12.05 ± 1.68</b> | <b>8.65 (Alt) ± 1.59</b> |

**Supplementary Table 2:** Interfacial hydrogen bonds (with standard deviations) between proteins for WT, delta, and omicron.

| Bound Pair  | WT             | Delta          | BA1            | BA2               |
|-------------|----------------|----------------|----------------|-------------------|
| RBD-ACE2    | -67.42 ± 7.47  | -72.10 ± 4.91  | -73.97 ± 6.81  | -78.64 ± 6.39     |
| RBD-C12.B1A | -77.9 ± 8.00   | -70.31 ± 8.41  | -47.62 ± 5.78  | -57.64 ± 6.29     |
| RBD-P4A1    | -115.91 ± 7.01 | -110.21 ± 7.51 | -73.71 ± 5.43  | -106.62 ± 5.43    |
| RBD-CR3022  | -95.41 ± 2.51  | -111.70 ± 7.80 | -82.36 ± 10.26 | -94.46 ± 9.38     |
| NTD-4A8     | -88.9 ± 17.9   | -81.1 ± 5.7    | -65.2 ± 12.2   | -93.67 ± 6.33     |
| FCD-Furin   | -83.6 ± 8.4    | -117.3 ± 4.8   | -93.2 ± 3.8    | -63.5 (Alt) ± 3.6 |

**Supplementary Table 3:** MM/GBSA Binding Energies (with standard deviations) in kcal/mol between proteins for WT, delta, and omicron.

Supplemental Figure 1 – Correlation of HBonds and Binding Free energy

## Variant RBD-ACE2 Binding

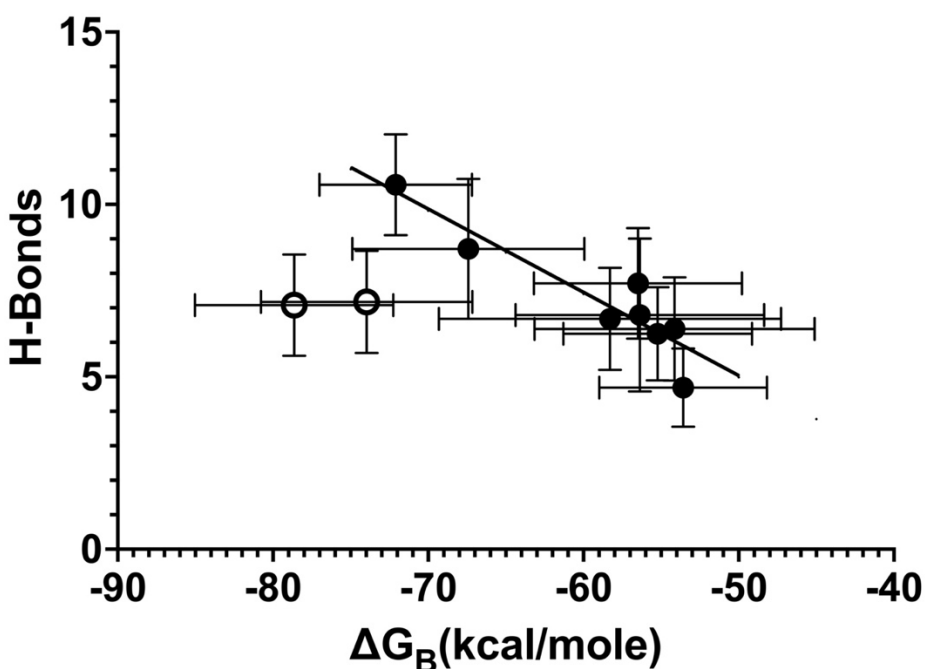

The solid circles are from simulations (left to right) Delta RBD-ACE1, WT RBD-ACE2, N439K RBD-ACE2, L452R RBD-ACE2, N501T RBD-ACE2, Beta RBD-ACE2, V367F RBD-ACE2, Alpha RBD-ACE2.

The solid line is a regression fit to those 8 points ( $H - Bonds = -0.2415 \Delta G_B - 7.09$ ) which has a regression coefficient  $R^2 = 0.85$ . Open circles are BA.2 (left) and BA.1 (right)

### Detailed list of HBond pairs

The following tables show Hbond pairs and their detection ratios for our simulations. The Hbond pairs are counted using a distance and angle approximation as described in methods.

The bond detection ratio is defined as  $n/N$ , where  $n$  is the number of snapshots in which the labelled Hbond is detected, and  $N$  is the total number of snapshots. Therefore, a bond detection ratio of 1 means that the corresponding bond was detected in every single snapshot of the simulation.

| WT RBD | ACE2   | Bond detection ratio |
|--------|--------|----------------------|
| A475   | Q24.A  | 0.0625               |
|        | S19.A  | 0.596                |
| G446   | Q42.A  | 0.187                |
| G476   | S19.A  | 0.005                |
| G496   | K353.A | 0.927                |
| G502   | K353.A | 0.980                |
| K417   | D30.A  | 0.384                |
|        | H34.A  | 0.221                |
| N487   | Q24.A  | 0.557                |
|        | Y83.A  | 0.980                |
| N501   | K353.A | 0.052                |
|        | Y41.A  | 0.129                |
| Q493   | E35.A  | 0.855                |
|        | H34.A  | 0.043                |
|        | K31.A  | 0.543                |
| Q498   | D38.A  | 0.293                |
|        | K353.A | 0.596                |
|        | Q42.A  | 0.028                |
| R403   | H34.A  | 0.004                |
| S477   | Q24.A  | 0.005                |
|        | S19.A  | 0.139                |
| T500   | D355.A | 0.365                |
|        | N330.A | 0.019                |
|        | Y41.A  | 0.317                |
| Y449   | D38.A  | 0.05                 |
|        | Q42.A  | 0.21                 |
| Y505   | E37.A  | 0.36                 |
|        | R393.A | 0.01                 |

**Supplementary Table 4:** HBond Pairs for WT RBD-ACE2 simulation.

| Delta RBD | ACE2 | Bond Detection Ratio |
|-----------|------|----------------------|
| A475      | Q24  | 0.095                |
|           | S19  | 0.754                |
| G446      | Q42  | 0.498                |
| G496      | K353 | 0.706                |
| G502      | K353 | 0.948                |
| K417      | D30  | 0.806                |
| N487      | Q24  | 0.507                |
|           | Y83  | 0.915                |
| N501      | K353 | 0.014                |
|           | Y41  | 0.076                |
| Q493      | E35  | 0.768                |
|           | H34  | 0.024                |
|           | K31  | 0.445                |
| Q498      | D38  | 0.028                |
|           | K353 | 0.735                |
|           | Q42  | 0.009                |
| S477      | S19  | 0.005                |
| T500      | D355 | 0.27                 |
|           | N330 | 0.062                |
|           | Y41  | 0.502                |
| Y449      | D38  | 0.924                |
|           | Q42  | 0.379                |
| Y453      | H34  | 0.066                |
| Y505      | E37  | 0.829                |
|           | R393 | 0.043                |

**Supplementary Table 5:** HBond Pairs for Delta RBD-ACE2 simulation.

| Omicron BA1 RBD | ACE2 | Bond detection ratio |
|-----------------|------|----------------------|
| A475            | Q24  | 0.037                |
|                 | S19  | 0.893                |
| G502            | K353 | 0.968                |
| H505            | K353 | 0.068                |
| N417            | H34  | 0.006                |
| N477            | Q24  | 0.025                |
|                 | S19  | 0.993                |
| N487            | Q24  | 0.262                |
|                 | Y83  | 0.875                |
| R403            | H34  | 0.012                |
| R493            | E35  | 1.281                |
|                 | H34  | 0.225                |
|                 | K31  | 0.006                |
| R498            | Q42  | 0.056                |
| S496            | D38  | 0.862                |
|                 | K353 | 0.012                |
| T500            | D355 | 0.443                |
|                 | N330 | 0.112                |
|                 | Y41  | 0.206                |
| Y449            | D38  | 0.212                |
| Y453            | H34  | 0.031                |
| Y501            | D38  | 0.019                |

**Supplementary Table 6:** HBond Pairs for Omicron BA1 RBD-ACE2 simulation.

| <b>Omicron BA2 RBD</b> | <b>ACE2</b> | <b>Bond detection ratio</b> |
|------------------------|-------------|-----------------------------|
| <b>A475</b>            | <b>Q24</b>  | <b>0.074</b>                |
|                        | <b>S19</b>  | <b>0.880</b>                |
| <b>G502</b>            | <b>K353</b> | <b>0.955</b>                |
| <b>H519</b>            | <b>D615</b> | <b>0.004</b>                |
| <b>N477</b>            | <b>Q24</b>  | <b>0.024</b>                |
|                        | <b>S19</b>  | <b>0.885</b>                |
| <b>N487</b>            | <b>Q24</b>  | <b>0.333</b>                |
|                        | <b>Y83</b>  | <b>0.910</b>                |
| <b>R493</b>            | <b>D38</b>  | <b>1.686</b>                |
|                        | <b>E35</b>  | <b>0.766</b>                |
|                        | <b>H34</b>  | <b>0.024</b>                |
|                        | <b>K31</b>  | <b>0.004</b>                |
| <b>R498</b>            | <b>Q42</b>  | <b>0.248</b>                |
| <b>T500</b>            | <b>D355</b> | <b>0.631</b>                |
|                        | <b>N330</b> | <b>0.069</b>                |
|                        | <b>Y41</b>  | <b>0.134</b>                |
| <b>Y453</b>            | <b>H34</b>  | <b>0.084</b>                |
| <b>Y473</b>            | <b>E23</b>  | <b>0.004</b>                |
| <b>Y489</b>            | <b>Q24</b>  | <b>0.004</b>                |
| <b>Y501</b>            | <b>K353</b> | <b>0.064</b>                |

**Supplementary Table 7:** HBond Pairs for Omicron BA2 RBD-ACE2 simulation.



| <b>WT RBD</b> | <b>C1A-B12</b> | <b>Bond detection ratio</b> |
|---------------|----------------|-----------------------------|
| <b>A475</b>   | N32.H          | <b>0.911</b>                |
|               | T28.H          | <b>0.65</b>                 |
| <b>D420</b>   | Y58.H          | <b>0.821</b>                |
| <b>G476</b>   | T28.H          | <b>0.228</b>                |
| <b>G496</b>   | S30.L          | <b>0.553</b>                |
| <b>G502</b>   | G28.L          | <b>0.894</b>                |
| <b>K417</b>   | D96.H          | <b>0.992</b>                |
|               | S98.H          | <b>0.667</b>                |
|               | Y52.H          | <b>0.691</b>                |
| <b>K458</b>   | S30.H          | <b>0.041</b>                |
|               | S31.H          | <b>0.098</b>                |
| <b>L455</b>   | Y33.H          | <b>0.943</b>                |
| <b>N460</b>   | G54.H          | <b>0.065</b>                |
| <b>N487</b>   | G26.H          | <b>0.496</b>                |
|               | R94.H          | <b>1.049</b>                |
| <b>N501</b>   | S30.L          | <b>0.211</b>                |
| <b>Q493</b>   | R100A.H        | <b>0.935</b>                |
|               | Y100B.H        | <b>0.016</b>                |
| <b>Q498</b>   | S30.L          | <b>0.268</b>                |
|               | S67.L          | <b>0.472</b>                |
| <b>R403</b>   | I92.L          | <b>1.398</b>                |
|               | S93.L          | <b>0.008</b>                |
| <b>R457</b>   | S53.H          | <b>0.951</b>                |
| <b>S477</b>   | G26.H          | <b>0.065</b>                |
| <b>S494</b>   | R100A.H        | <b>1.659</b>                |
|               | Y32.L          | <b>0.041</b>                |
| <b>T415</b>   | Y58.H          | <b>0.041</b>                |
| <b>T500</b>   | G28.L          | <b>0.024</b>                |
| <b>V503</b>   | Q27.L          | <b>0.138</b>                |
| <b>Y421</b>   | G54.H          | <b>0.374</b>                |
| <b>Y453</b>   | G99.H          | <b>0.967</b>                |
|               | Y32.L          | <b>0.878</b>                |
| <b>Y473</b>   | S31.H          | <b>0.846</b>                |
|               | S53.H          | <b>0.008</b>                |
| <b>Y489</b>   | R94.H          | <b>0.024</b>                |
| <b>Y505</b>   | D1 .L          | <b>0.041</b>                |
|               | S93.L          | <b>0.528</b>                |

**Supplementary Table 8:** HBond Pairs for WT RBD-C1A-B12 (7KFV) antibody simulation. Here, 'H' are residues from the heavy chain and 'L' are residues from the light chain.

| <b>Delta RBD</b> | <b>C1A-B12</b> | <b>Bond detection ratio</b> |
|------------------|----------------|-----------------------------|
| <b>A475</b>      | <b>N32.H</b>   | 0.65                        |
|                  | <b>R94.H</b>   | 0.056                       |
| <b>G496</b>      | <b>S30.L</b>   | 0.427                       |
| <b>G502</b>      | <b>G28.L</b>   | 0.517                       |
| <b>K417</b>      | <b>D96.H</b>   | 0.979                       |
|                  | <b>S98.H</b>   | 0.566                       |
|                  | <b>Y52.H</b>   | 0.678                       |
| <b>K458</b>      | <b>S30.H</b>   | 0.014                       |
|                  | <b>S31.H</b>   | 0.014                       |
| <b>L455</b>      | <b>Y33.H</b>   | 0.881                       |
| <b>N460</b>      | <b>G54.H</b>   | 0.664                       |
| <b>N487</b>      | <b>R94.H</b>   | 1.552                       |
|                  | <b>Y102.H</b>  | 0.441                       |
| <b>N501</b>      | <b>S30.L</b>   | 0.573                       |
| <b>Q493</b>      | <b>R100A.H</b> | 0.399                       |
|                  | <b>Y100B.H</b> | 0.042                       |
|                  | <b>Y32.L</b>   | 0.035                       |
| <b>Q498</b>      | <b>S30.L</b>   | 0.035                       |
|                  | <b>S67.L</b>   | 0.413                       |
| <b>R403</b>      | <b>I92.L</b>   | 1.455                       |
|                  | <b>S98.H</b>   | 0.077                       |
| <b>R457</b>      | <b>S53.H</b>   | 0.643                       |
| <b>S477</b>      | <b>E 1 .H</b>  | 0.007                       |
|                  | <b>G26.H</b>   | 0.294                       |
| <b>S494</b>      | <b>R100A.H</b> | 0.049                       |
|                  | <b>Y32.L</b>   | 0.049                       |
| <b>T415</b>      | <b>Y58.H</b>   | 0.028                       |
| <b>T500</b>      | <b>G28.L</b>   | 0.182                       |
|                  | <b>Q27.L</b>   | 0.014                       |
| <b>Y421</b>      | <b>G54.H</b>   | 0.413                       |
|                  | <b>S53.H</b>   | 0.035                       |
| <b>Y453</b>      | <b>G99.H</b>   | 0.58                        |
|                  | <b>Y32.L</b>   | 0.252                       |
| <b>Y473</b>      | <b>S31.H</b>   | 0.979                       |
| <b>Y489</b>      | <b>R94.H</b>   | 0.035                       |
| <b>Y495</b>      | <b>Y32.L</b>   | 0.322                       |
| <b>Y505</b>      | <b>Q27.L</b>   | 0.119                       |
|                  | <b>S93.L</b>   | 0.266                       |

**Supplementary Table 9:** HBond Pairs for Delta RBD-C1A-B12 (7KFV) antibody simulation. Here, 'H' are residues from the heavy chain and 'L' are residues from the light chain.

| Omicron BA1 | C1A-B12 | Bond detection ratio |
|-------------|---------|----------------------|
| A475        | N32.H   | 0.917355             |
|             | T28.H   | 0.066116             |
| D405        | S93.L   | 0.008264             |
| G502        | G28.L   | 0.809917             |
| H505        | Q27.L   | 0.082645             |
| K478        | E 1 .H  | 0.024793             |
| L455        | Y33.H   | 0.991736             |
| N417        | Y33.H   | 0.066116             |
|             | Y52.H   | 0.132231             |
| N460        | G54.H   | 0.438017             |
|             | G55.H   | 0.082645             |
| N477        | G26.H   | 0.760                |
|             | T28.H   | 0.049                |
| N487        | G26.H   | 0.016                |
|             | R94.H   | 1.636                |
|             | Y102.H  | 0.190                |
| Q474        | S31.H   | 0.008                |
| R403        | I92.L   | 1.677                |
| R408        | Y58.H   | 0.008                |
| R457        | S53.H   | 0.553                |
| R493        | Y100B.H | 0.082                |
| R498        | S30.L   | 0.107                |
| S494        | R100A.H | 0.082                |
| S496        | R100A.H | 0.363                |
| T415        | Y58.H   | 0.165                |
| V503        | Q27.L   | 0.008                |
| Y421        | G54.H   | 0.719                |
|             | S53.H   | 0.016                |
|             | Y33.H   | 0.231                |
| Y449        | R100A.H | 0.008                |
| Y473        | S31.H   | 0.933                |
| Y489        | R94.H   | 0.024                |
| Y495        | Y32.L   | 0.049                |
| Y501        | S30.L   | 0.008                |

**Supplementary Table 10:** HBond Pairs for Omicron BA1 RBD-C1A-B12 (7KFV) antibody simulation. Here, ‘H’ are residues from the heavy chain and ‘L’ are residues from the light chain.

| <b>Omicron<br/>BA2</b> | <b>C1A-<br/>B12</b> | <b>Bond<br/>detection<br/>ratio</b> |
|------------------------|---------------------|-------------------------------------|
| <b>A475</b>            | <b>N32.H</b>        | 0.908602                            |
|                        | <b>R94.H</b>        | 0.010753                            |
|                        | <b>S31.H</b>        | 0.010753                            |
|                        | <b>T28.H</b>        | 0.139                               |
| <b>G502</b>            | <b>Q27.L</b>        | 0.752                               |
| <b>K458</b>            | <b>S31.H</b>        | 0.032                               |
| <b>L455</b>            | <b>Y33.H</b>        | 0.973                               |
| <b>N417</b>            | <b>Y33.H</b>        | 0.005                               |
| <b>N460</b>            | <b>G54.H</b>        | 0.698                               |
| <b>N477</b>            | <b>G26.H</b>        | 0.526                               |
| <b>N487</b>            | <b>G26.H</b>        | 0.053                               |
|                        | <b>R94.H</b>        | 1.639                               |
|                        | <b>Y102.H</b>       | 0.209                               |
| <b>R403</b>            | <b>I92.L</b>        | 0.924                               |
|                        | <b>S98.H</b>        | 0.521                               |
| <b>R405</b>            | <b>D 1 .L</b>       | 0.478                               |
|                        | <b>Y94.L</b>        | 0.139                               |
| <b>R457</b>            | <b>S53.H</b>        | 0.021                               |
| <b>R493</b>            | <b>S31.L</b>        | 0.010                               |
|                        | <b>Y32.L</b>        | 0.478                               |
| <b>R498</b>            | <b>G28.L</b>        | 0.032                               |
|                        | <b>S30.L</b>        | 0.118                               |
|                        | <b>S67.L</b>        | 0.016                               |
| <b>T500</b>            | <b>G28.L</b>        | 0.784                               |
| <b>Y421</b>            | <b>G54.H</b>        | 0.424                               |
|                        | <b>S53.H</b>        | 0.091                               |
|                        | <b>Y33.H</b>        | 0.220                               |
| <b>Y453</b>            | <b>G99.H</b>        | 0.032                               |
| <b>Y473</b>            | <b>S31.H</b>        | 0.817                               |
|                        | <b>S53.H</b>        | 0.021                               |
| <b>Y495</b>            | <b>Y32.L</b>        | 0.010                               |
| <b>Y501</b>            | <b>I29.L</b>        | 0.021                               |

**Supplementary Table 11:** HBond Pairs for Omicron BA2 RBD-C1A-B12 (7KFV) antibody simulation. Here, 'H' are residues from the heavy chain and 'L' are residues from the light chain.

| WT RBD | P4A1   | Bond detection ratio |
|--------|--------|----------------------|
| A475   | I28.H  | 0.667                |
|        | N32.H  | 0.755                |
| D420   | S56.H  | 0.892                |
| G496   | S30.C  | 0.873                |
| G502   | G28.C  | 0.598                |
| K417   | E101.H | 0.039                |
|        | Q100.H | 0.912                |
| K458   | S30.H  | 0.176                |
|        | S31.H  | 0.52                 |
| L455   | Y33.H  | 0.824                |
| N460   | G54.H  | 0.422                |
| N487   | G26.H  | 0.461                |
|        | R97.H  | 1.48                 |
| N501   | S30.C  | 1.167                |
| Q493   | E101.H | 0.647                |
| Q498   | S67.C  | 0.569                |
| R403   | N92.C  | 1.843                |
| R457   | S53.H  | 0.196                |
| S477   | G26.H  | 0.343                |
| T500   | G28.C  | 0.01                 |
| V503   | Q27.C  | 0.01                 |
| Y421   | G54.H  | 0.667                |
| Y453   | E101.H | 0.882                |
| Y473   | S31.H  | 0.853                |
| Y489   | R97.H  | 0.049                |
| Y495   | W32.C  | 0.843                |
| Y505   | S93.C  | 1                    |

**Supplementary Table 12:** HBond Pairs for WT RBD-P4A1 (7CJF) antibody simulation. Here, 'H' are residues from the heavy chain and 'L' are residues from the light chain.

| Delta RBD | P4A1   | Bond detection ratio |
|-----------|--------|----------------------|
| A475      | I28.H  | 0.725                |
|           | N32.H  | 0.804                |
| D420      | S56.H  | 0.912                |
| G496      | S30.L  | 0.922                |
| G502      | G28.L  | 0.627                |
| K417      | E101.H | 0.363                |
|           | Q100.H | 0.951                |
| K458      | S30.H  | 0.186                |
|           | S31.H  | 0.422                |
|           | S53.H  | 0.02                 |
| L455      | Y33.H  | 0.745                |
| N460      | G54.H  | 0.402                |
| N487      | G26.H  | 0.5                  |
|           | R97.H  | 1.52                 |
| N501      | S30.L  | 1.343                |
| Q493      | E101.H | 0.167                |
| Q498      | S67.L  | 0.529                |
| R403      | N92.L  | 1.794                |
| R457      | S53.H  | 0.265                |
| S477      | G26.H  | 0.265                |
| V503      | Q27.L  | 0.01                 |
| Y421      | G54.H  | 0.559                |
|           | S53.H  | 0.039                |
| Y449      | S31.L  | 0.01                 |
| Y453      | E101.H | 0.853                |
| Y473      | S31.H  | 0.814                |
| Y489      | R97.H  | 0.029                |
| Y495      | W32.L  | 0.843                |
| Y505      | S93.L  | 1                    |

**Supplementary Table 13:** HBond Pairs for Delta RBD-P4A1 (7CJF) antibody simulation. Here, 'H' are residues from the heavy chain and 'L' are residues from the light chain.

| Omicron BA1 RBD | P4A1 (7CJF) | Bond detection ratio |
|-----------------|-------------|----------------------|
| A475            | I28.H       | 0.790                |
|                 | N32.H       | 0.856                |
| D420            | S56.H       | 0.950                |
| G416            | S56.H       | 0.011                |
| G502            | G28.L       | 0.093                |
|                 | S30.L       | 0.016                |
| H505            | G28.L       | 0.027                |
|                 | W32.L       | 0.254                |
| K458            | S30.H       | 0.082                |
|                 | S31.H       | 0.121                |
|                 | S53.H       | 0.005                |
| L455            | Y33.H       | 0.022                |
| N417            | Q100.H      | 0.723                |
|                 | Y33.H       | 0.961                |
| N460            | G54.H       | 0.232                |
|                 | G55.H       | 0.027                |
|                 | S56.H       | 0.055                |
| N477            | G26.H       | 0.950                |
| N487            | R97.H       | 1.419                |
| Q474            | S31.H       | 0.027                |
| R403            | N92.L       | 0.939                |
| R457            | S53.H       | 0.718                |
| R493            | E101.H      | 0.933                |
| R498            | S30.L       | 0.027                |
|                 | S67.L       | 0.033                |
| T500            | S30.L       | 0.027                |
| V503            | Q27.L       | 0.005                |
| Y421            | G54.H       | 0.403                |
|                 | S53.H       | 0.033                |
|                 | Y33.H       | 0.480                |
| Y453            | E101.H      | 0.624                |
| Y473            | S31.H       | 0.453                |
| Y489            | R97.H       | 0.071                |
| Y501            | W32.L       | 0.071                |

**Supplementary Table 14:** HBond Pairs for Omicron BA1 RBD-P4A1 (7CJF) antibody simulation. Here, 'H' are residues from the heavy chain and 'L' are residues from the light chain.

| Omicron BA2 RBD | P4A1 (7CJF) | Bond detection ratio |
|-----------------|-------------|----------------------|
| A475            | I28.H       | 0.678218             |
|                 | N32.H       | 0.816832             |
| A520            | T393        | 0.00495              |
| D420            | S56.H       | 0.886139             |
| E516 ND         | N394        | 0.00495              |
| G502            | G28.L       | 0.985                |
| H505            | N92.L       | 0.044                |
|                 | Q27.L       | 0.128                |
| K458            | S30.H       | 0.019                |
|                 | S31.H       | 0.123                |
| L455            | Y33.H       | 0.079                |
| N405            | N92.L       | 0.108                |
| N417            | Q100.H      | 0.821                |
|                 | Y33.H       | 0.905                |
|                 | Y52.H       | 0.039                |
| N460            | G54.H       | 0.311                |
|                 | S56.H       | 0.029                |
| N477            | F27.H       | 0.004                |
|                 | G26.H       | 0.514                |
| N487            | G26.H       | 0.034                |
|                 | R97.H       | 1.569                |
|                 | Y107.H      | 0.005                |
| Q474            | S31.H       | 0.005                |
| R403            | E101.H      | 1.524                |
|                 | N92.L       | 0.113                |
| R457            | S53.H       | 0.272                |
| R493            | E101.H      | 0.915                |
| T500            | S30.L       | 0.292                |
| Y421            | G54.H       | 0.658                |
|                 | S53.H       | 0.019                |
|                 | Y33.H       | 0.084                |
| Y453            | E101.H      | 0.099                |
| Y473            | S31.H       | 0.698                |
|                 | S53.H       | 0.064                |
| Y489            | R97.H       | 0.054                |
| Y501            | S31.L       | 0.727                |

**Supplementary Table 15:** HBond Pairs for Omicron BA2 RBD-P4A1 (7CJF) antibody simulation. Here, 'H' are residues from the heavy chain and 'L' are residues from the light chain.



| WT RBD | CR3022 | Bond detection ratio |
|--------|--------|----------------------|
| C379   | I102.H | 0.932                |
| D428   | S32.L  | 1.429                |
|        | S33.L  | 0.91                 |
|        | Y31.L  | 0.023                |
| F374   | K74.H  | 0.008                |
| F377   | Y52.H  | 0.932                |
| G381   | I102.H | 0.91                 |
|        | Y38.L  | 0.985                |
| H519   | N35.L  | 0.098                |
| K378   | D55.H  | 0.902                |
|        | E57.H  | 0.857                |
| K386   | D107.H | 0.895                |
|        | E61.L  | 0.812                |
| N370   | Y27.H  | 0.707                |
| S366   | Y27.H  | 0.008                |
| S383   | S100.H | 0.511                |
|        | T104.H | 0.241                |
| T376   | D55.H  | 0.218                |
| T385   | Q 1 .H | 0.008                |
|        | S100.H | 0.902                |
|        | Y32.H  | 0.045                |
| T430   | S33.L  | 0.143                |
|        | Y31.L  | 0.113                |

**Supplementary Table 16:** HBond Pairs for Omicron BA1 RBD-CR3022 (6YOR) antibody simulation. Here, 'H' are residues from the heavy chain and 'L' are residues from the light chain.

| <b>Delta RBD</b> | <b>CR3022</b> | <b>Bond Detection Ratio</b> |
|------------------|---------------|-----------------------------|
| C379.E           | I102.H        | 0.935                       |
| D389.E           | T59.L         | 0.153                       |
| D428.E           | S32.L         | 0.089                       |
|                  | Y31.L         | 0.048                       |
| F374.E           | K74.H         | 0.008                       |
| F377.E           | Y52.H         | 0.96                        |
| G381.E           | I102.H        | 0.935                       |
|                  | T104.H        | 0.008                       |
|                  | Y38.L         | 0.984                       |
| H519.E           | N35.L         | 0.032                       |
| K378.E           | D55.H         | 0.815                       |
|                  | E57.H         | 0.855                       |
| K386.E           | D107.H        | 0.758                       |
|                  | E61.L         | 0.871                       |
|                  | Y55.L         | 0.048                       |
| L517.E           | N35.L         | 0.919                       |
|                  | S33.L         | 0.863                       |
| N370.E           | G28.H         | 0.185                       |
| Q414.E           | E57.H         | 0.008                       |
| S375.E           | K74.H         | 0.04                        |
| S383.E           | S100.H        | 0.331                       |
|                  | T104.H        | 0.089                       |
| T376.E           | D55.H         | 0.016                       |
| T385.E           | D107.H        | 0.056                       |
|                  | Q 1 .H        | 0.081                       |
|                  | S100.H        | 0.524                       |
| T430.E           | S33.L         | 0.927                       |
| V382.E           | T104.H        | 0.032                       |
| Y369.E           | Q 1 .H        | 0.065                       |
| Y380.E           | E57.H         | 0.137                       |

**Supplementary Table 17:** HBond Pairs for Delta RBD-CR3022 (6YOR) antibody simulation. Here, 'H' are residues from the heavy chain and 'L' are residues from the light chain.

| Omicron BA1 | CR_3022 (6YOR) | Bond detection ratio |
|-------------|----------------|----------------------|
| C379        | I102.H         | 0.971                |
| D428        | S32.L          | 1.482                |
|             | S33.L          | 0.352                |
|             | Y31.L          | 0.115                |
| F377        | Y52.H          | 0.949                |
| G381        | I102.H         | 0.719                |
|             | Y38.L          | 0.812                |
| H519        | N35.L          | 0.115                |
| K378        | D55.H          | 0.834                |
|             | E57.H          | 0.784                |
| K386        | D107.H         | 0.748                |
|             | E61.L          | 0.755                |
|             | Q 1 .H         | 0.007                |
| L517        | N35.L          | 0.007                |
| N370        | G28.H          | 0.014                |
|             | Y27.H          | 0.244                |
| N388        | Q 1 .H         | 0.021                |
|             | Y55.L          | 0.007                |
| S366        | Y27.H          | 0.165                |
| S383        | S100.H         | 0.899                |
|             | T104.H         | 0.028                |
| T376        | D55.H          | 0.187                |
| T385        | Q 1 .H         | 0.100                |
|             | S100.H         | 0.460                |
|             | T31.H          | 0.064                |
|             | Y32.H          | 0.035                |
| T430        | S33.L          | 0.071                |

**Supplementary Table 18:** HBond Pairs for Omicron BA1 RBD-CR\_3022 (6YOR) antibody simulation. Here, 'H' are residues from the heavy chain and 'L' are residues from the light chain.

| Omicron<br>BA2 | CR_3022<br>(6YOR) | Bond detection<br>Ratio |
|----------------|-------------------|-------------------------|
| C379           | I102.H            | 0.968                   |
| D428           | S32.L             | 0.819                   |
| F375           | K74.H             | 0.021                   |
| F377           | Y52.H             | 0.936                   |
| F515           | S33.L             | 0.010                   |
| G381           | I102.H            | 0.856                   |
|                | Y38.L             | 0.984                   |
| H519           | N35.L             | 0.015                   |
| K378           | D55.H             | 0.856                   |
|                | E57.H             | 0.691                   |
| K386           | D107.H            | 0.898                   |
|                | E61.L             | 0.824                   |
| L517           | N35.L             | 0.632                   |
|                | S33.L             | 0.989                   |
| N370           | Y27.H             | 0.25                    |
| N388           | Y55.L             | 0.015                   |
| S366           | Y27.H             | 0.164                   |
| S383           | S100.H            | 0.872                   |
| T385           | S100.H            | 0.005                   |
|                | Y32.H             | 0.010                   |
| T430           | S33.L             | 0.425                   |

**Supplementary Table 19:** HBond Pairs for Omicron BA2 RBD-CR\_3022 (6YOR) antibody simulation. Here, 'H' are residues from the heavy chain and 'L' are residues from the light chain.

| WT NTD | 4A8    | Bond Detection Ratio |
|--------|--------|----------------------|
| K147   | E72.H  | 0.703                |
|        | L29.H  | 0.673                |
|        | L32.H  | 0.446                |
| K150   | D55.H  | 0.03                 |
|        | E54.H  | 0.079                |
|        | P53.H  | 0.01                 |
|        | Y111.H | 0.04                 |
| K97    | D107.H | 0.099                |
| L249   | A103.H | 0.05                 |
|        | V102.H | 0.693                |
| N149   | D55.H  | 0.465                |
|        | E54.H  | 0.069                |
|        | P53.H  | 0.663                |
| N99    | P106.H | 0.366                |
| R246   | E31.H  | 0.02                 |
|        | G26.H  | 1.396                |
| S247   | Y27.H  | 0.614                |
| S254   | E 1 .H | 0.158                |
| S98    | D107.H | 0.228                |
| T250   | T105.H | 0.01                 |
| W152   | Y111.H | 0.307                |
| Y145   | E31.H  | 0.327                |
|        | T30.H  | 0.743                |
| Y248   | E31.H  | 0.99                 |

**Supplementary Table 20:** HBond Pairs for WT NTD-4A8 (7C2L) antibody simulation. Here, 'H' are residues from the heavy chain and 'L' are residues from the light chain.

| Delta NTD | 4A8    | Bond detection ratio |
|-----------|--------|----------------------|
| A292      | D290   | 0.017                |
| D290      | R273   | 0.017                |
| D294      | S297   | 0.05                 |
| H146      | T30.H  | 0.008                |
| K147      | E72.H  | 0.125                |
|           | L29.H  | 0.45                 |
|           | L32.H  | 0.583                |
|           | T30.H  | 0.025                |
| K150      | D55.H  | 0.008                |
|           | E54.H  | 0.6                  |
|           | P53.H  | 0.033                |
|           | Y111.H | 0.017                |
| N148      | D55.H  | 0.167                |
| N149      | D55.H  | 0.708                |
| P295      | T299   | 0.042                |
| Q14       | E 1 .H | 0.117                |
|           | G26.H  | 0.183                |
|           | S75.H  | 0.017                |
|           | T28.H  | 0.025                |
| R246      | E31.H  | 1.8                  |
| S247      | G104.H | 0.008                |
| S254      | E 1 .H | 0.008                |
|           | Y27.H  | 0.008                |
| S297      | C291   | 0.008                |
| S297      | D294   | 0.183                |
| W258      | E 1 .H | 0.017                |
| Y145      | Y111.H | 0.05                 |
| Y248      | E31.H  | 0.917                |
|           | G104.H | 1.483                |

**Supplementary Table 21:** HBond Pairs for Delta NTD-4A8 (7C2L) antibody simulation. Here, ‘H’ are residues from the heavy chain and ‘L’ are residues from the light chain.

| BA1<br>NTD | 4A8    | Bond<br>Detection<br>Ratio |
|------------|--------|----------------------------|
| K147       | E72.H  | 0.540                      |
|            | L29.H  | 0.338                      |
|            | L32.H  | 0.048                      |
|            | S33.H  | 0.008                      |
| K150       | E54.H  | 0.169                      |
|            | P53.H  | 0.016                      |
|            | Y113.H | 0.008                      |
| K97        | D107.H | 0.169                      |
| L249       | V102.H | 0.943                      |
| N149       | D55.H  | 0.096                      |
|            | E54.H  | 0.048                      |
|            | P53.H  | 0.669                      |
| N99        | D107.H | 0.016                      |
|            | P106.H | 0.419                      |
| R246       | E31.H  | 0.169                      |
|            | G26.H  | 0.056                      |
|            | T100.H | 0.008                      |
|            | Y27.H  | 0.016                      |
| S247       | Y27.H  | 0.016                      |
| S254       | N58.L  | 0.032                      |
|            | Y54.L  | 0.024                      |
| S98        | D107.H | 0.217                      |
|            | P106.H | 0.056                      |
| T250       | A103.H | 0.088                      |
|            | G104.H | 0.161                      |
| W152       | D107.H | 0.008                      |
|            | T105.H | 0.153                      |
|            | Y111.H | 0.008                      |
| Y248       | E31.H  | 0.088                      |

**Supplementary Table 22:** HBond Pairs for Omicron BA1 NTD-4A8 (7C2L) antibody simulation. Here, 'H' are residues from the heavy chain and 'L' are residues from the light chain.

| BA2<br>NTD | 4A8    | Bond<br>Detection<br>Ratio |
|------------|--------|----------------------------|
| K147.A     | E72.H  | 0.675                      |
|            | L29.H  | 0.682                      |
|            | L32.H  | 0.299                      |
| K150.A     | E54.H  | 0.274                      |
|            | P53.H  | 0.21                       |
|            | Y111.H | 0.013                      |
| K97.A      | D107.H | 0.038                      |
| L249.A     | G104.H | 0.389                      |
|            | V102.H | 0.395                      |
| N148.A     | D55.H  | 0.006                      |
| N149.A     | D55.H  | 0.471                      |
|            | E54.H  | 0.013                      |
|            | P53.H  | 0.408                      |
| N99.A      | D107.H | 0.019                      |
|            | P106.H | 0.076                      |
| R246.A     | E31.H  | 0.115                      |
|            | G26.H  | 0.503                      |
|            | T28.H  | 0.013                      |
| S247.A     | Y27.H  | 0.471                      |
| S254.A     | E 1 .H | 0.459                      |
|            | S61.L  | 0.07                       |
| S98.A      | D107.H | 0.153                      |
| W152.A     | Y111.H | 0.115                      |
| Y145.A     | E31.H  | 0.363                      |
|            | T30.H  | 0.841                      |
| Y248.A     | E31.H  | 1                          |
|            | G104.H | 0.146                      |
|            | Y27.H  | 0.019                      |

**Supplementary Table 23:** HBond Pairs for Omicron BA2 NTD-4A8 (7C2L) antibody simulation. Here, 'H' are residues from the heavy chain and 'L' are residues from the light chain.



| <b>FCD</b> | <b>Furin</b> | <b>Bond detection ratio</b> |
|------------|--------------|-----------------------------|
| P1         | E123         | 0.026                       |
|            | E150         | 0.043                       |
|            | V124         | 0.184                       |
| R2         | D157         | 1.473                       |
|            | E129         | 0.885                       |
|            | G158         | 0.061                       |
|            | Y201         | 0.745                       |
| R3         | D151         | 0.228                       |
|            | E150         | 0.921                       |
|            | G148         | 1.771                       |
| R5         | A185         | 0.921                       |
|            | D151         | 0.017                       |
|            | D199         | 1.263                       |
|            | P149         | 0.087                       |
|            | S146         | 0.798                       |
|            | S261         | 1                           |
| S6         | H87          | 0.315                       |
|            | N188         | 0.324                       |
|            | S261         | 0.140                       |
| S6         | H87          | 0.008                       |
| S6         | N188         | 0.008                       |

**Supplementary Table 24:** HBond Pairs for WT (PRRARS) FCD-Furin simulation.

| Delta FCD | Furin | Bond detection ratio |
|-----------|-------|----------------------|
| R1        | D152  | 0.309                |
|           | D157  | 0.097                |
|           | E123  | 0.085                |
|           | E150  | 0.036                |
|           | G122  | 0.012                |
|           | T155  | 0.533                |
| R2        | D157  | 1.412                |
|           | E129  | 0.891                |
|           | G158  | 0.006                |
|           | Y201  | 0.8                  |
| R3        | E150  | 1.648                |
|           | G148  | 1.733                |
| R5        | A185  | 0.909                |
|           | D151  | 1.867                |
|           | D199  | 1.442                |
|           | S146  | 0.964                |
|           | S261  | 0.382                |
|           | D199  | 0.006                |
| S6        | H87   | 0.406                |
|           | N188  | 0.606                |
|           | S261  | 0.564                |
|           | T258  | 0.242                |
| S6        | H87   | 0.018                |
| S6        | S261  | 0.018                |
| S6        | N188  | 0.018                |

**Supplementary Table 25:** HBond Pairs for Delta (RRRARS) FCD-Furin simulation.

| BA1, BA2<br>FCD<br>(HRRARS) | Furin | Bond<br>detection<br>ratio |
|-----------------------------|-------|----------------------------|
| H1                          | E123  | 0.05                       |
|                             | E150  | 0.007                      |
|                             | G122  | 0.021                      |
| R2                          | D157  | 1.773                      |
|                             | E129  | 0.05                       |
|                             | G158  | 0.085                      |
|                             | Y201  | 0.816                      |
| R3                          | D151  | 0.383                      |
|                             | E150  | 1.326                      |
|                             | G148  | 0.922                      |
| R5                          | A185  | 1                          |
|                             | D199  | 1.794                      |
|                             | P149  | 0.22                       |
|                             | S146  | 0.879                      |
|                             | S261  | 1.702                      |
| S6                          | H87   | 0.894                      |
|                             | N188  | 0.106                      |
|                             | S261  | 0.007                      |

**Supplementary Table 26:** HBond Pairs for BA1, BA2, FCD-Furin simulation.

| BA1, BA2<br>Alternate<br>FCD<br>(KSHRRA) | Furin | Bond<br>detection<br>ratio |
|------------------------------------------|-------|----------------------------|
| A6                                       | N188  | 0.583                      |
| H3                                       | E150  | 0.259                      |
|                                          | G148  | 1.878                      |
| K1                                       | D121  | 0.094                      |
|                                          | E123  | 0.554                      |
|                                          | E150  | 0.518                      |
|                                          | G122  | 0.014                      |
|                                          | V124  | 0.072                      |
| R4                                       | D46   | 1.712                      |
|                                          | H87   | 0.101                      |
|                                          | S261  | 0.029                      |
| R5                                       | A185  | 0.022                      |
|                                          | D151  | 0.014                      |
|                                          | D199  | 1.504                      |
|                                          | S146  | 0.849                      |
|                                          | S186  | 0.058                      |
|                                          | S261  | 0.05                       |
|                                          | T202  | 0.05                       |
|                                          | T260  | 0.007                      |
|                                          | Y201  | 0.007                      |
| S2                                       | E129  | 0.108                      |
|                                          | V124  | 0.014                      |

**Supplementary Table 27:** HBond Pairs for alternate BA1, BA2, FCD-Furin simulation.
